# Supplementary material for: Luminescent protein–rare earth fluoride nanoflowers
Source: Royal Society of Chemistry journal article supplement (doi:10.1039/d3ma00002h), 2023-01-01
Supplement: d3ma00002h1.pdf [file d3ma00002h1.pdf]

## Supporting Information

### Luminescent Protein-Rare Earth Fluoride Nanoflowers

Wenyu Wei, Manman He, Jianrui Ma, Yirui Fan, Peng Liu, Jianxi Xiao

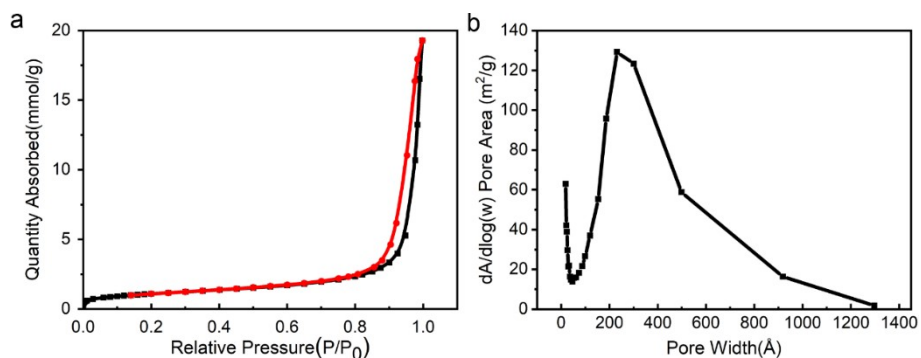

**Figure S1.** Nitrogen adsorption/desorption isotherms of trypsin- $\text{Na}_5\text{Yb}_9\text{F}_{32}$  hybrid nanoflowers (a), and the corresponding BJH pore sizes distribution plot of trypsin- $\text{Na}_5\text{Yb}_9\text{F}_{32}$  (b).

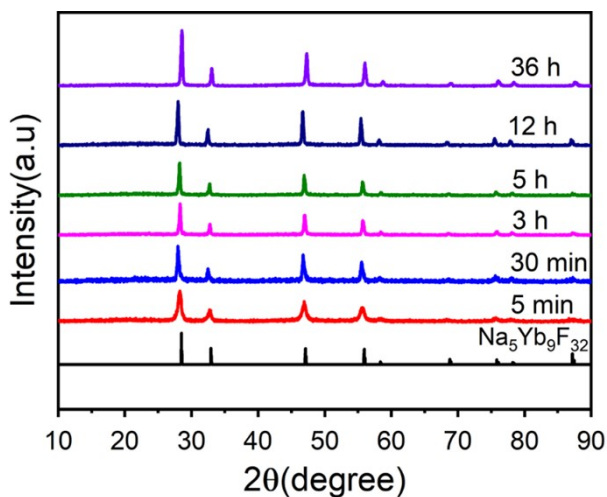

**Figure S2.** XRD patterns of hybrid nanomaterials prepared at different incubation time: 5 min, 30 min, 3 hrs, 5 hrs, 12 hrs and 36 hrs. Standard XRD pattern of  $\text{Na}_5\text{Yb}_9\text{F}_{32}$  (JCPDS No. 27-1426) was shown beneath the plots of hybrid nanomaterials.

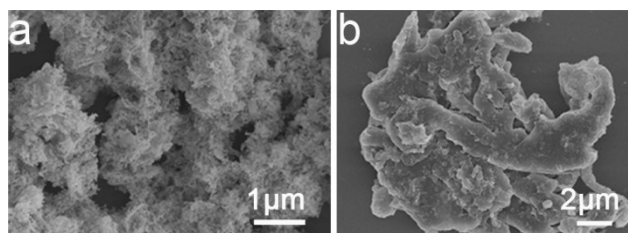

**Figure S3.** SEM images of the trypsin- $\text{Na}_5\text{Yb}_9\text{F}_{32}$  hybrid nanoflowers treated by calcination (a), and glutaraldehyde/ EDTA (b). Calcination was performed at 350 °C for 6 hrs. The trypsin- $\text{Na}_5\text{Yb}_9\text{F}_{32}$  hybrid nanoflowers were first treated with glutaraldehyde (0.8 wt %) and then EDTA (1 wt %).
